# Supplementary material for: Imprinted polymers for chiral resolution of (±)-ephedrine. Part 2: probing pre-polymerisation equilibria in different solvents by NMR
Source: Royal Society of Chemistry journal article supplement (doi:10.1039/b806376a), 2008-01-01
Supplement: b806376a.pdf [file b806376a.pdf]

Imprinted polymers for chiral resolution of (+/-)-ephedrine, 2: Probing pre-polymerisation equilibria in different solvents by NMR.

Richard J. Ansell\*, Dongyao Wang<sup>a</sup> and Kim L. Kuah<sup>b</sup>

School of Chemistry, University of Leeds, Leeds, UK.

Supplementary Information

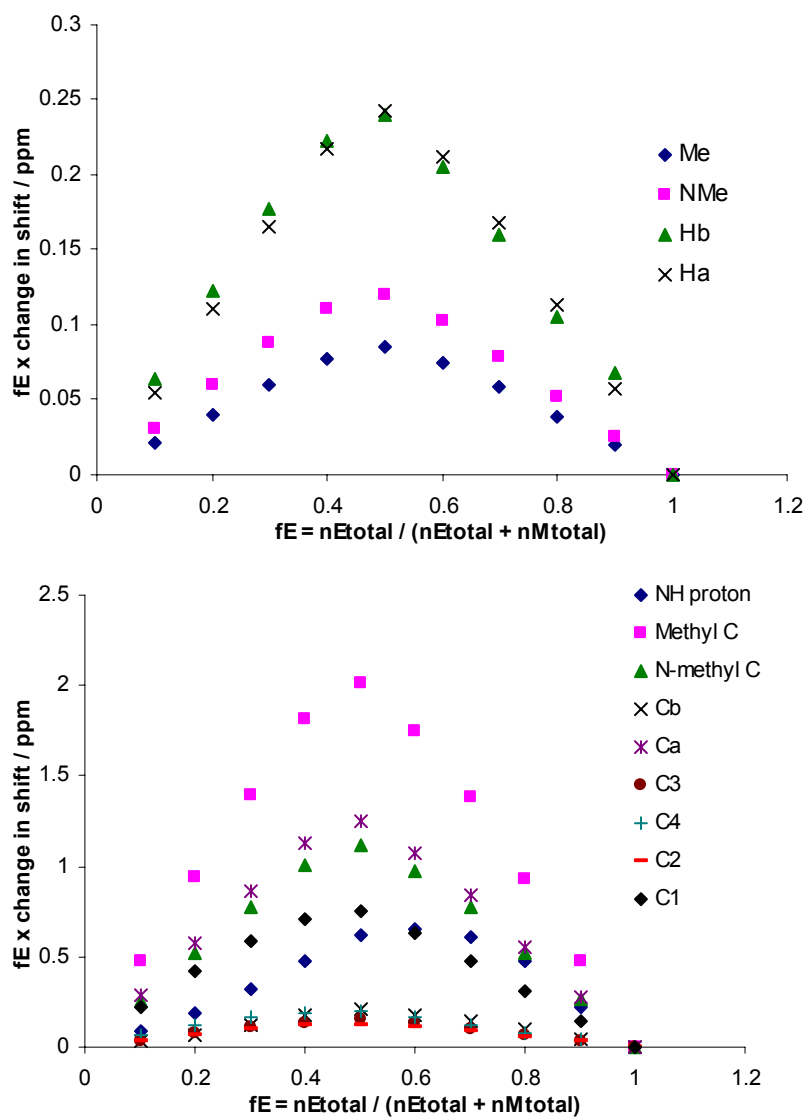

Figure S1 Job plots for the association between (-)-ephedrine and MAA in acetonitrile-*d*<sub>3</sub>. a) non-exchangeable protons b) NH protons and carbon nuclei.

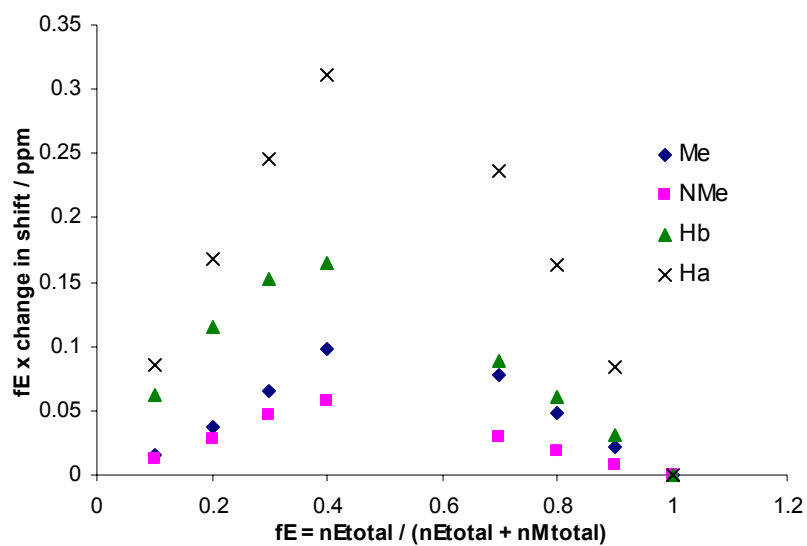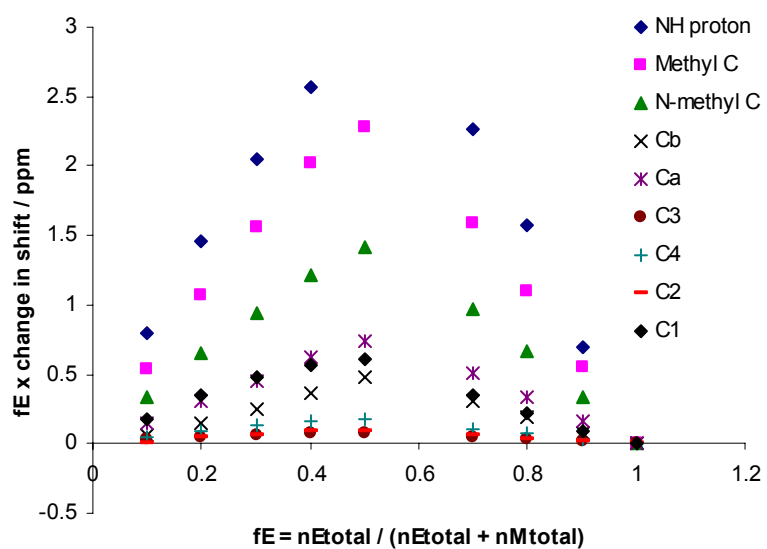

Figure S2 Job plots for the association between (-)-ephedrine and MAA in toluene- $d_8$ . a) non-exchangeable protons b) NH protons and carbon nuclei.

|           | Species | Nucleus: chemical shift / ppm |         |         |         |         |         |         |         |         |         |         |                      |         |         |         |         |         |         |         |         |
|-----------|---------|-------------------------------|---------|---------|---------|---------|---------|---------|---------|---------|---------|---------|----------------------|---------|---------|---------|---------|---------|---------|---------|---------|
|           |         | Me                            | CHx     | CHy     | Meb     | Nme     | Hb      | Ha      | NH/OH   | MeC     | Cu      | Cv      | COOH                 | Cmeb    | CNMe    | Cb      | Ca      | C3      | C4      | C2      | C1      |
| no X      | T       | -                             | -       | -       | 0.83123 | 2.50199 | 2.81431 | 4.76846 | nu      | -       | -       | -       | -                    | 14.3904 | 34.111  | 60.4283 | 72.8966 | 126.12  | 127.075 | 128.123 | 141.423 |
|           | T2      | -                             | -       | -       | 0.92693 | 1.76305 | 2.24327 | 4.32979 | nu      | -       | -       | -       | -                    | 11.325  | 31.7432 | 59.8285 | 75.5834 | 125.738 | 125.95  | 127.097 | 144.265 |
|           | M       | 1.9717                        | 5.6887  | 6.24049 | -       | -       | -       | -       | -       | 18.8595 | 127.988 | 134.861 | 167.234 <sup>a</sup> | -       | -       | -       | -       | -       | -       | -       | -       |
|           | M2      | 1.95749                       | 5.68593 | 6.26028 | -       | -       | -       | -       | -       | 17.756  | 127.834 | 135.82  | 173.561 <sup>a</sup> | -       | -       | -       | -       | -       | -       | -       | -       |
|           | T*      | -                             | -       | -       | 0.83122 | 2.4819  | 2.79972 | 4.75523 | 3.51193 | -       | -       | -       | -                    | 14.3389 | 34.0591 | 60.403  | 72.9758 | 126.114 | 127.054 | 128.097 | 141.499 |
|           | MT      | nu                            | nu      | nu      | 1.11419 | 2.73983 | 3.1526  | 5.37383 | 8.24926 | nu      | nu      | nu      | 175.823              | 8.89944 | 31.2236 | 61.924  | 70.7434 | 125.783 | 127.341 | 128.281 | 140.234 |
|           | MT2     | nu                            | nu      | nu      | 1.06806 | 2.83536 | 3.54933 | 5.51598 | 10.3215 | nu      | nu      | nu      | 173.306              | 8.69978 | 30.9007 | 61.0624 | 71.0399 | 125.71  | 127.478 | 128.368 | 139.347 |
|           | MT3     | nu                            | nu      | nu      | 1.11289 | 2.84072 | 3.51094 | 5.46514 | 13.6553 | nu      | nu      | nu      | 171.26               | 8.39458 | 30.9289 | 61.2034 | 70.9692 | 125.675 | 127.311 | 128.201 | 139.918 |
| with EDMA | M       | nu                            | nu      | nu      | -       | -       | -       | -       | -       | nu      | nu      | nu      | 166 <sup>b</sup>     | -       | -       | -       | -       | -       | -       | -       |         |
|           | M2      | nu                            | nu      | nu      | -       | -       | -       | -       | -       | nu      | nu      | nu      | 172 <sup>b</sup>     | -       | -       | -       | -       | -       | -       | -       |         |
|           | T*      | -                             | -       | -       | 0.85443 | 2.4702  | 2.79063 | 4.76141 | 3.60628 | -       | -       | -       | 0                    | 13.626  | 33.4619 | 60.1216 | 72.7709 | 125.718 | 126.462 | 127.562 | 141.766 |
|           | MT      | nu                            | nu      | nu      | 1.11154 | 2.78056 | 3.24756 | 5.4022  | 8.09115 | nu      | nu      | nu      | 174.991              | 8.3902  | 30.5875 | 61.1779 | 70.1407 | 125.346 | 126.781 | 127.749 | 139.764 |
|           | MT2     | nu                            | nu      | nu      | 1.10773 | 2.89899 | 3.60332 | 5.50425 | 8.63997 | nu      | nu      | nu      | 171.736              | 8.75056 | 30.7242 | 60.37   | 70.5389 | 125.633 | 126.99  | 127.845 | 139.302 |
|           | MT3     | nu                            | nu      | nu      | 1.11889 | 2.88842 | 3.6206  | 5.48246 | 13.619  | nu      | nu      | nu      | 168.135              | 7.42026 | 30.139  | 60.3841 | 70.5472 | 124.378 | 126.733 | 127.642 | 140.342 |
| with DVB  | M       | nu                            | nu      | nu      | -       | -       | -       | -       | -       | nu      | nu      | nu      | 169.2 <sup>b</sup>   | -       | -       | -       | -       | -       | -       | -       |         |
|           | M2      | nu                            | nu      | nu      | -       | -       | -       | -       | -       | nu      | nu      | nu      | 173.6 <sup>b</sup>   | -       | -       | -       | -       | -       | -       | -       |         |
|           | T*      | -                             | -       | -       | 0.72219 | 2.31839 | 2.65133 | 4.65434 | 1.67206 | -       | -       | -       | 0                    | 14.1439 | 33.8575 | 60.2647 | 72.8248 | nu      | nu      | nu      | 141.584 |
|           | MT      | nu                            | nu      | nu      | 0.99534 | 2.53365 | 2.9832  | 5.29178 | 8.28302 | nu      | nu      | nu      | 175.606              | 9.09973 | 31.1367 | 61.633  | 70.8382 | nu      | nu      | nu      | 140.411 |
|           | MT2     | nu                            | nu      | nu      | 1.06552 | 2.78865 | 3.60939 | 5.7315  | 9.79795 | nu      | nu      | nu      | 173.261              | 6.67586 | 29.7031 | 61.258  | 70.172  | nu      | nu      | nu      | 138.858 |
|           | MT3     | nu                            | nu      | nu      | 0.92948 | 2.6008  | 3.33005 | 5.29788 | 14.4884 | nu      | nu      | nu      | 169.846              | 9.53897 | 31.3168 | 60.7737 | 71.5104 | nu      | nu      | nu      | 140.336 |

Table S1 Fitted chemical shifts for titrations in d-chloroform. - = nucleus not present in species, nu = data not used. Shifts for T and T2 obtained from self-titration of ephedrine. Shifts for T\* calculated from titration of ephedrine with MAA ignoring dimerisation of ephedrine. <sup>a</sup> Shifts calculated from self titration of MAA then used as constant parameters for fitting titration of ephedrine with MAA. <sup>b</sup> Shifts manually estimated and used as constant parameters for fitting titration of ephedrine with MAA.

|      | Species | Nucleus: chemical shift / ppm |         |         |         |         |         |         |         |         |    |         |                      |         |         |         |         |    |    |    |         |
|------|---------|-------------------------------|---------|---------|---------|---------|---------|---------|---------|---------|----|---------|----------------------|---------|---------|---------|---------|----|----|----|---------|
|      |         | Me                            | CHx     | CHy     | Meb     | Nme     | Hb      | Ha      | NH/OH   | MeC     | Cu | Cv      | COOH                 | Cmeb    | CNMe    | Cb      | Ca      | C3 | C4 | C2 | C1      |
| no X | T       | -                             | -       | -       | 0.57325 | 2.09581 | 2.45462 | 4.60412 | nu      | -       | -  | -       | -                    | 14.0757 | 33.8992 | 60.8902 | 72.1366 | nu | nu | nu | 142.352 |
|      | T2      | -                             | -       | -       | 1.07    | 2.12695 | 2.61755 | 4.84243 | nu      | -       | -  | -       | -                    | 12.7617 | 33.433  | 61.3008 | 75.4931 | nu | nu | nu | 144.887 |
|      | M       | 1.57963                       | 4.86037 | 5.98762 | -       | -       | -       | -       | -       | 17.685  | nu | 135.727 | 170.365 <sup>a</sup> | -       | -       | -       | -       | -  | -  | -  | -       |
|      | M2      | 1.74956                       | 5.27414 | 6.15434 | -       | -       | -       | -       | -       | 17.7127 | nu | 136.272 | 173.942 <sup>a</sup> | -       | -       | -       | -       | -  | -  | -  | -       |
|      | T*      | -                             | -       | -       | 0.61847 | 2.097   | 2.47196 | 4.62351 | 3.42585 | -       | -  | -       | -                    | 13.9813 | 33.8463 | 60.9447 | 72.4868 | nu | nu | nu | 142.604 |
|      | MT      | nu                            | nu      | nu      | 0.96248 | 2.22382 | 2.77977 | 5.4339  | 9.04619 | nu      | nu | nu      | 175.453              | 8.52487 | 30.5826 | 62.2035 | 71.0595 | nu | nu | nu | 141.573 |
|      | MT2     | nu                            | nu      | nu      | 0.67589 | 2.39311 | 3.58838 | 5.64463 | 10.1008 | nu      | nu | nu      | 171.598              | 8.56199 | 30.728  | 60.8581 | 71.1892 | nu | nu | nu | 139.944 |

|              |     |    |    |    |         |         |         |         |         |    |    |    |                  |         |         |         |         |    |    |    |         |
|--------------|-----|----|----|----|---------|---------|---------|---------|---------|----|----|----|------------------|---------|---------|---------|---------|----|----|----|---------|
|              | MT3 | nu | nu | nu | 0.93918 | 2.43123 | 3.27785 | 5.50434 | 13.8145 | nu | nu | nu | 172.614          | 8.26632 | 30.6311 | 61.7439 | 71.5905 | nu | nu | nu | 141.032 |
| with<br>EDMA | M   | nu | nu | nu | -       | -       | -       | -       | -       | nu | nu | nu | 170 <sup>b</sup> | -       | -       | -       | -       | -  | -  | -  | -       |
|              | M2  | nu | nu | nu | -       | -       | -       | -       | -       | nu | nu | nu | 173 <sup>b</sup> | -       | -       | -       | -       | -  | -  | -  | -       |
|              | T*  | -  | -  | -  | 0.73595 | 2.27796 | 2.62802 | 4.71268 | 3.46856 | -  | -  | -  | -                | 14.0598 | 33.9974 | 61.0884 | 72.9826 | nu | nu | nu | 142.988 |
|              | MT  | nu | nu | nu | 1.00719 | 2.46888 | 2.98144 | 5.4081  | 8.61182 | nu | nu | nu | 175.47           | 9.03036 | 30.9565 | 62.0264 | 71.0425 | nu | nu | nu | 141.801 |
|              | MT2 | nu | nu | nu | 0.98027 | 2.65159 | 3.6066  | 5.69823 | 7.55276 | nu | nu | nu | 172.002          | 8.29632 | 30.5834 | 61.175  | 70.7186 | nu | nu | nu | 140.514 |
|              | MT3 | nu | nu | nu | 0.96258 | 2.71467 | 3.54717 | 5.49472 | 13.8807 | nu | nu | nu | 169.034          | 8.53402 | 31.051  | 61.2583 | 71.8554 | nu | nu | nu | 141.111 |

Table S1 Fitted chemical shifts for titrations in d8-toluene. - = nucleus not present in species, nu = data not used. Shifts for T and T2 obtained from self-titration of ephedrine. Shifts for T\* calculated from titration of ephedrine with MAA ignoring dimerisation of ephedrine. <sup>a</sup> Shifts calculated from self titration of MAA then used as constant parameters for fitting titration of ephedrine with MAA. <sup>b</sup> Shifts manually estimated and used as constant parameters for fitting titration of ephedrine with MAA.

|              | Species | Nucleus: chemical shift / ppm |         |         |         |         |         |         |         |         |         |         |                      |         |         |         |         |         |         |         |         |
|--------------|---------|-------------------------------|---------|---------|---------|---------|---------|---------|---------|---------|---------|---------|----------------------|---------|---------|---------|---------|---------|---------|---------|---------|
|              |         | Me                            | CHx     | CHy     | Meb     | Nme     | Hb      | Ha      | NH      | MeC     | Cu      | Cv      | COOH                 | Cmeb    | CNMe    | Cb      | Ca      | C3      | C4      | C2      | C1      |
| no X         | T       | -                             | -       | -       | 0.78647 | 2.43047 | 2.75804 | 4.72103 | nu      | -       | -       | -       | -                    | 13.1644 | 32.9467 | 60.0887 | 72.4637 | 125.821 | 126.353 | 127.536 | 142.438 |
|              | T2      | -                             | -       | -       | 0.9861  | 2.33316 | 2.70282 | 4.84027 | nu      | -       | -       | -       | -                    | 12.2515 | 32.7568 | 60.4377 | 73.4138 | 125.913 | 126.236 | 127.46  | 143.442 |
|              | M       | 1.88845                       | 5.62794 | 6.04764 | -       | -       | -       | -       | -       | 17.0569 | 124.963 | 136.015 | 167.308 <sup>a</sup> | -       | -       | -       | -       | -       | -       | -       | -       |
|              | M2      | 1.91327                       | 5.7285  | 6.21706 | -       | -       | -       | -       | -       | 16.7324 | 127.534 | 135.563 | 173.12 <sup>a</sup>  | -       | -       | -       | -       | -       | -       | -       | -       |
|              | T*      | -                             | -       | -       | 0.76021 | 2.38861 | 2.71934 | 4.68771 | 3.61299 | -       | -       | -       | -                    | 13.1584 | 32.9585 | 60.1263 | 72.5701 | 125.854 | 126.37  | 127.55  | 142.513 |
|              | MT      | nu                            | nu      | nu      | 0.97889 | 2.66503 | 3.27392 | 5.28619 | 8.39328 | nu      | nu      | nu      | 174.286              | 8.30546 | 30.2488 | 60.7539 | 69.6264 | 125.493 | 126.785 | 127.818 | 140.847 |
|              | MT2     | nu                            | nu      | nu      | 0.98852 | 2.72218 | 3.41012 | 5.2551  | 8.71942 | nu      | nu      | nu      | 171.74               | 8.33685 | 30.354  | 60.3348 | 69.8137 | 125.483 | 127.11  | 127.95  | 140.101 |
|              | MT3     | nu                            | nu      | nu      | 1.06859 | 2.86411 | 3.58701 | 5.28215 | 13.1895 | nu      | nu      | nu      | 172.36               | 8.04501 | 30.8587 | 60.1789 | 70.8525 | 125.349 | 127.641 | 128.188 | 139.114 |
| with<br>EDMA | M       | nu                            | nu      | nu      | -       | -       | -       | -       | -       | nu      | nu      | nu      | 169.5 <sup>b</sup>   | -       | -       | -       | -       | -       | -       | -       |         |
|              | M2      | nu                            | nu      | nu      | -       | -       | -       | -       | -       | nu      | nu      | nu      | 173 <sup>b</sup>     | -       | -       | -       | -       | -       | -       | -       |         |
|              | T*      | -                             | -       | -       | 0.75966 | 2.39939 | 2.7323  | 4.7169  | 4.0939  | -       | -       | -       | -                    | 13.0117 | 32.9504 | 60.2036 | 72.3637 | 125.795 | 126.324 | 127.522 | 142.415 |
|              | MT      | nu                            | nu      | nu      | 1.01097 | 2.71176 | 3.30347 | 5.33928 | 8.20548 | nu      | nu      | nu      | 175.256              | 8.27426 | 30.2597 | 60.8288 | 69.6471 | 125.485 | 126.74  | 127.787 | 140.861 |
|              | MT2     | nu                            | nu      | nu      | 1.0082  | 2.76545 | 3.43707 | 5.30968 | 8.64575 | nu      | nu      | nu      | 168.43               | 8.44274 | 30.4635 | 60.3982 | 69.936  | 125.459 | 126.982 | 127.884 | 140.265 |
|              | MT3     | nu                            | nu      | nu      | 1.12638 | 2.9535  | 3.70638 | 5.44702 | 14.0781 | nu      | nu      | nu      | 166 <sup>b</sup>     | 7.44818 | 30.5768 | 60.2649 | 70.906  | 125.394 | 127.501 | 128.133 | 139.477 |

Table S3 Fitted chemical shifts for titrations in d3-acetonitrile. - = nucleus not present in species, nu = data not used. Shifts for T and T2 obtained from self-titration of ephedrine. Shifts for T\* calculated from titration of ephedrine with MAA ignoring dimerisation of ephedrine. <sup>a</sup> Shifts calculated from self titration of MAA then used as constant parameters for fitting titration of ephedrine with MAA. <sup>b</sup> Shifts manually estimated and used as constant parameters for fitting titration of ephedrine with MAA.
